# Supplementary material for: Pericardial Effusion Due to Trichosporon japonicum: A Case Report and Review of the Literature
Source: MDPI journal article supplement (doi:10.3390/pathogens11050598), 2022-05-20
Supplement: s1 [file s1]

**Table S1.** Molecular identification of *Trichosporon japonicum* sequencing ITS, D1/D2 and IGS genetic regions.

|                                         | ITS                                          |                                |                                   |                         | D1/D2                          |                               |                                   |                       | IGS1                           |                               |                                   |                       |
|-----------------------------------------|----------------------------------------------|--------------------------------|-----------------------------------|-------------------------|--------------------------------|-------------------------------|-----------------------------------|-----------------------|--------------------------------|-------------------------------|-----------------------------------|-----------------------|
| Samples                                 | ID                                           | Type strain ID collection      | Nucleotide alignment (identity %) | Genbank accession no.   | ID                             | Type strain ID collection     | Nucleotide alignment (identity %) | Genbank accession no. | ID                             | Type strain ID collection     | Nucleotide alignment (identity %) | Genbank accession no. |
| Pericardial fluid                       | <i>Trichosporon japonicum</i>                | CBS 8641                       | 472/473 (99.79%)                  | NR_073263.1             | <i>Trichosporon japonicum</i>  | CBS 8641                      | 492/493 (99.80%)                  | KY109955.1            | <i>Trichosporon japonicum</i>  | JCM835 7                      | 458/458 (100%)                    | AB066426.1            |
|                                         | <i>Trichosporon asteroides</i>               | CBS 2481                       | 471/473 (99.58%)                  | KY105727.1              | <i>Trichosporon asahii</i>     | CBS 2479                      | 491/492 (99.80%)                  | KY109922.1            | <i>Trichosporon asteroides</i> | CBS 2481                      | 462/477 (96.86%)                  | EU934802.1            |
|                                         | <i>Trichosporon insectorum/faecale</i>       | CBS1042 2/ CBS 4828            | 470/473 (99.37%)                  | KY105746.1 / KY105736.1 | <i>Trichosporon asteroides</i> | CBS 2481                      | 491/493 (99.59%)                  | KY109937.1            | <i>Trichosporon faecale</i>    | CBS 4828                      | 407/509 (79.96%)                  | KM488293.1            |
|                                         | <i>Trichosporon asahii</i>                   | CBS 2479                       | 469/473 (99.15%)                  | KY105709.1              | <i>Trichosporon insectorum</i> | CBS 10422                     | 489/491 (99.59%)                  | KY109953.1            | <i>Trichosporon asahii</i>     | PUMCH BY15                    | 403/505 (79.80%)                  | JF303013.1            |
|                                         | Swab no. 1 (sternal surgery scar wound)      | <i>Trichosporon insectorum</i> | CBS 10422                         | 425/425 (100%)          | KY105746.1                     | <i>Trichosporon japonicum</i> | CBS 8641                          | 547/547 (100%)        | KY109955.1                     | <i>Trichosporon japonicum</i> | JCM835 7                          | 448/448 (100%)        |
| <i>Trichosporon faecale</i>             |                                              | CBS 4828                       | 425/425 (100%)                    | KY105736.1              | <i>Trichosporon asteroides</i> | CBS 2481                      | 546/547 (99.82%)                  | KY109937.1            | <i>Trichosporon asteroides</i> | CBS 2481                      | 453/468 (96.79%)                  | EU934802.1            |
| <i>Trichosporon japonicum</i>           |                                              | CBS 8641                       | 425/425 (100%)                    | NR_073263.1             | <i>Trichosporon asahii</i>     | CBS 2479                      | 545/547 (99.63%)                  | KY109922.1            | <i>Trichosporon faecale</i>    | CBS 4828                      | 395/479 (79.48%)                  | KM488293.1            |
| <i>Trichosporon asahii</i>              |                                              | CBS 2479                       | 423/423 (100%)                    | AB018013.1              | <i>Trichosporon insectorum</i> | ATCC MYA-4361                 | 542/547 (99.09%)                  | NG_042467.1           | <i>Trichosporon asahii</i>     | PUMCH BY15                    | 391/493 (79.31%)                  | JF303013.1            |
| Swab no. 2 (sternal surgery scar wound) |                                              | <i>Trichosporon insectorum</i> | CBS 10422                         | 427/427 (100%)          | KY105746.1                     | <i>Trichosporon japonicum</i> | CBS 8641                          | 486/486 (100%)        | KY109955.1                     | <i>Trichosporon japonicum</i> | JCM835 7                          | 470/470 (100%)        |
|                                         | <i>Trichosporon faecale</i>                  | CBS 4828                       | 427/427 (100%)                    | KY105736.1              | <i>Trichosporon asahii</i>     | CBS 2479                      | 486/486 (100%)                    | KY109922.1            | <i>Trichosporon asteroides</i> | CBS 2481                      | 490/506 (96.84%)                  | EU934802.1            |
|                                         | <i>Trichosporon japonicum</i>                | CBS 8641                       | 427/427 (100%)                    | NR_073263.1             | <i>Trichosporon insectorum</i> | CBS 10422                     | 485/486 (99.79%)                  | KY109953.1            | <i>Trichosporon faecale</i>    | CBS 4828                      | 432/534 (80.90%)                  | KM488293.1            |
|                                         | <i>Trichosporon asahii/asteroides</i>        | CBS2479 / CBS 2481             | 426/427 (99.77%)                  | KY105709.1 / KY105727.1 | <i>Trichosporon asteroides</i> | CBS 2481                      | 485/486 (99.79%)                  | KY109937.1            | <i>Trichosporon asahii</i>     | PUMCH BY15                    | 427/529 (80.72%)                  | JF303013.1            |
|                                         | Swab no. 3 (Subcutaneous mediastinal sample) | <i>Trichosporon japonicum</i>  | CBS 8641                          | 483/483 (100%)          | NR_073263.1                    | <i>Trichosporon japonicum</i> | CBS 8641                          | 496/496 (100%)        | KY109955.1                     | <i>Trichosporon japonicum</i> | JCM835 7                          | 455/455 (100%)        |
| <i>Trichosporon asteroides</i>          |                                              | CBS 2481                       | 482/483 (99.79%)                  | KY105727.1              | <i>Trichosporon asahii</i>     | CBS 2479                      | 496/496 (100%)                    | KY109922.1            | <i>Trichosporon asteroides</i> | CBS 2481                      | 461/476 (96.85%)                  | EU934802.1            |
| <i>Trichosporon insectorum/faecale</i>  |                                              | CBS1042 2/ CBS 4828            | 481/483 (99.59%)                  | KY105746.1 / KY105736.1 | <i>Trichosporon insectorum</i> | CBS 10422                     | 495/496 (99.80%)                  | KY109953.1            | <i>Trichosporon faecale</i>    | CBS 4828                      | 403/505 (79.80%)                  | KM488293.1            |

|  |                                      |             |                     |            |                                          |             |                     |                |                                      |               |                     |            |
|--|--------------------------------------|-------------|---------------------|------------|------------------------------------------|-------------|---------------------|----------------|--------------------------------------|---------------|---------------------|------------|
|  | <i>Trichosporon</i><br><i>asahii</i> | CBS<br>2479 | 480/483<br>(99.38%) | KY105709.1 | <i>Trichosporon</i><br><i>asteroides</i> | CBS<br>2481 | 495/496<br>(99.80%) | KY109937<br>.1 | <i>Trichosporon</i><br><i>asahii</i> | PUMCH<br>BY15 | 399/501<br>(79.64%) | JF303013.1 |
|--|--------------------------------------|-------------|---------------------|------------|------------------------------------------|-------------|---------------------|----------------|--------------------------------------|---------------|---------------------|------------|

ID: identification; ITS: internal transcribed spacer; D1/D2: domains of the ribosomal DNA large-subunit; IGS: intergenic spacer; no.: number
